# Supplementary material for: Activity-guided engineering of natural productcarrierproteins
Source: Royal Society of Chemistry journal article supplement (doi:10.1039/c0mb00251h), 2010-12-24
Supplement: c0mb00251h.pdf [file c0mb00251h.pdf]

# Activity-Guided Engineering of Natural Product Carrier Proteins

Andrew S. Worthington, Gene H. Hur and Michael D. Burkart\*

## Electronic Supplementary Information

### Cloning of parent CP genes into pET22b

The vector  $\Delta$ NEntB/pET22b was supplied by the Walsh laboratory at Harvard University.<sup>1</sup> AcpP and FrnN were generated using 0.5  $\mu$ M each primer for and reverse – NdeI and XhoI restriction sites (underlined) with 1 ng of alternate vector containing the gene of interest.

PCR reaction mixture contains primers at 0.1  $\mu$ M each, 50 mM KCl, 10 mM Tris pH 8.3, 2 mM MgCl<sub>2</sub>, 200  $\mu$ M each dNTP, and 1 unit Pfu.

Thermocycling conditions were as follows:

95°C for 2 minutes

35 cycles of: 95°C for 30 seconds, 59°C for 30 seconds, 72°C for 30 seconds

72°C for 10 minutes

### Forward and Reverse Primers

AcpPforward: ATTATATCATATGAGCACTATCGAAGAACGCG

AcpPreverse: TGATGTCCTCGAGCGCCTGGTGGCCGTTG

FrnNforward: ATTATATCATATGAGCGCACTGACCGTCGACG

FrnNreverse: TGATGTCCTCGAGGGCGGTGGCCGGGGTGG

EntBforward: ATTATATCATATGTCCCTGAAATATGTGGCCG

EntBreverse: TGATGTCCTCGAGTTTCACCTCGCGGG

### PCR Ligation

Stocks of each primer set with a concentration of 2.5  $\mu$ M per primer were made. One  $\mu$ L of each primer set (e.g. A3, F2F3) and 5 total primer sets were used per 25  $\mu$ L reaction (0.1  $\mu$ M for each primer in the final reaction) – see Supplementary Table 1.

The PCR reaction mixture contained primers at 0.1  $\mu$ M each, 50 mM KCl, 10 mM Tris pH 8.3, 2 mM MgCl<sub>2</sub>, 200  $\mu$ M each dNTP, and 1 unit Pfu.

Thermocycling conditions were as follows:

95°C for 2 minutes

30 cycles of: 95°C for 30 seconds, 64°C for 30 seconds, 72°C for 30 seconds

72°C for 10 minutes

Holding at 4°C

A second round of PCR reactions was performed, with 1  $\mu$ L of this reaction with 0.5  $\mu$ M (final concentration) of each CP specific primer (e.g. AcpPforward and FrnNreverse) with same reaction conditions (25  $\mu$ L), except a different program was used (we had to vary the annealing temperature for each construct)

Thermocycling conditions were as follows:

95°C for 2 minutes

40 cycles of: 95°C for 30 seconds, 58-72°C for 30 seconds, 72°C for 30 seconds

72°C for 10 minutes

Holding at 4°C

The second PCR reaction was run on 2% agarose gel stained with 1 % ethidium bromide. Each properly sized band was excised and purified with the Qiaquick Gel Extraction Kit (Qiagen). Inserts were then digested with 20 units each of XhoI and NdeI (NEB) at 37°C overnight, followed by purification with the AccuPrep PCR Purification Kit (Bioneer, Inc.). Inserts were ligated to pET22b vector (Novagen) that had been digested with XhoI and NdeI and reacted with Calf Intestinal Alkaline Phosphatase (NEB). The resulting constructs were transformed into Subcloning Efficiency DH5a competent cells (Invitrogen) and plated on LB/AMP plates. Colonies were screened through sequencing of purified plasmid (Qiagen kit), which was performed by Eton Biosciences (San Diego, CA).

### **Chimeric CP Panel Primers**

#### A1 Primers

AcpPforward

ACPA1rev:

CATTGTTGGTAACTTCTTCCTGCTTAACGCCAGCTGTTTCGCCGATAATTTTCT  
TAACGCGTTCTTCGAT

#### A2 Primer

ACPA2rev:

CTCTTCTTCCAGAGCCATTACCAGCTCAACGGTGTCAAGAGAATCCGCGCCC  
AGGTCTTC

#### A3 Primers

ACPA3revA: GCCTGAACGGTGGTGATTTTCTCAGCTTCTTCGTCCGGAATC

ACPA3forB: CACCACCGTTCAGGCTGCCATTGATTACATCAACGGCCACCAGG

AcpPreverse

#### F1 Primers

FrnNforward

FrnNF1revA: CGGCGAGCAGTTTCTTGAGGTCGTCGACGGTCAGTG

FrnNF1forB: GAAACTGCTCGCCGAGACCGCCGGGAGGACG

FrnNF1revC: CGTGTCGAGTTCTCCGGCGAGGTCGACGCTGTCGTCTCTCCCCG

F2 Primer

FrnNF2rev:

CCGCTGCTGGAGCACGGCGGCCGTCTCCAGCAGCGCGAGGGAGTCGTAGCCG  
AGGTCC

F3 Primers

FrnNF3revA:

CAGTTCGCGCGGGGTGCCAGCCGGCCGACCGTCTCGTCAGTCAG

FrnNF3forB:

CCCCGCGCGAACTGCTCGACGAGGTCAACACCACCCCGGCCACCG

FrnNreverse

E1 Primers

EntBforward

EntBE1revA: CTTTCAGTCATCACCACCCGGCCAGAACGTCCGGCCACATATTTTC

EntBE1forB: GTGATGACTGAAGAATTACTGCCAGCACCTATCCCCGCCAGC

EntBE1revC:

CATCGGACTCGTCCAGCAACGGCAGGATCACCTCACGCAGCGCCGCTTTGCT  
GGCGGGGATAG

E2 Primer

EntBE2rev:

GCACTTTGCGCCAGCGCGCCGCCAGCGCCATCATGCGCACCGAATCCAGACC  
GTAGTCGATCAGGTTGTC

E3 Primers

EntBE3revA: CCACCAGGCGTCGATGGTCGGGTTTTTCGCCAGCATGACAAAG

EntBE3forB : CGACGCCTGGTGGAAGCTACTCTCCCGCGAGGTGAAA

EntBreverse

Junction Primers

A1A2FOR : GTTACCAACAATGCTTCTTTTCGTTGAAGACCTGGGCGCGG

A1F2FOR : GTTACCAACAATGCTTCTTTTCGTGGACCTCGGCTACGAC

A1E2FOR : GTTACCAACAATGCTTCTTTTCGATGACGACAACCTGATCG

F1F2FOR : GGAGAACTCGACACGCCCTTCGTGGACCTCGGCTACGAC

F1E2FOR : GGAGAACTCGACACGCCCTTCGATGACGACAACCTGATCG

F1A2FOR : GGAGAACTCGACACGCCCTTCGTTGAAGACCTGGGCGCGG

E1E2FOR : GACGAGTCCGATGAACCGTTCGATGACGACAACCTGATCG

E1A2FOR : GACGAGTCCGATGAACCGTTCGTTGAAGACCTGGGCGCGG

E1F2FOR : GACGAGTCCGATGAACCGTTCGTGGACCTCGGCTACGAC

A2A3FOR : GCTCTGGAAGAAGAGTTTGATACTGAGATTCCGGACGAAG

A2F3FOR : GCTCTGGAAGAAGAGTTTGATATCGCGCTGACTGACGAGACG

A2E3FOR : GCTCTGGAAGAAGAGTTTGATATCGACTTTGTCATGCTGGC

F2F3FOR : GTGCTCCAGCAGCGGTACGGCATCGCGCTGACTGACGAGACG

F2E3FOR : GTGCTCCAGCAGCGGTACGGCATCGACTTTGTCATGCTGGC

F2A3FOR : GTGCTCCAGCAGCGGTACGGCACTGAGATTCCGGACGAAG  
E2E3FOR : GGCGCAAAGTGCATGGTGATATCGACTTTGTCATGCTGGC  
E2A3FOR : GGCGCAAAGTGCATGGTGATACTGAGATTCCGGACGAAG  
E2F3FOR : GGCGCAAAGTGCATGGTGATATCGCGCTGACTGACGAGACG

**Supplementary Table 1.** Primer combinations used in the construction of the chimeric carrier proteins

|      | A2 | A3 | A4 | A5 | A6 | A7 | A8 | A9 | F2 | F3 | F4 | F5 | F6 | F7 | F8 | F9 | E2 | E3 | E4 | E5 | E6 | E7 | E8 | E9 |
|------|----|----|----|----|----|----|----|----|----|----|----|----|----|----|----|----|----|----|----|----|----|----|----|----|
| A1   | X  | X  |    |    |    |    |    |    |    |    |    | X  |    |    | X  | X  |    |    | X  |    | X  | X  |    |    |
| A1A2 | X  | X  |    |    |    |    |    |    |    |    |    |    |    |    |    |    |    |    |    |    |    |    |    |    |
| A1F2 |    |    |    |    |    |    |    |    |    |    |    | X  |    |    | X  | X  |    |    |    |    |    |    |    |    |
| A1E2 |    |    |    |    |    |    |    |    |    |    |    |    |    |    |    |    |    |    | X  |    | X  | X  |    |    |
| F1   |    |    | X  |    | X  | X  |    |    | X  | X  |    |    |    |    |    |    |    |    |    | X  |    |    | X  | X  |
| F1F2 |    |    |    |    |    |    |    |    | X  | X  |    |    |    |    |    |    |    |    |    |    |    |    |    |    |
| F1E2 |    |    |    |    |    |    |    |    |    |    |    |    |    |    |    |    |    |    |    | X  |    |    | X  | X  |
| F1A2 |    |    | X  |    | X  | X  |    |    |    |    |    |    |    |    |    |    |    |    |    |    |    |    |    |    |
| E1   |    |    |    | X  |    |    | X  | X  |    |    | X  |    | X  | X  |    |    | X  | X  |    |    |    |    |    |    |
| E1E2 |    |    |    |    |    |    |    |    |    |    |    |    |    |    |    |    | X  | X  |    |    |    |    |    |    |
| E1A2 |    |    |    | X  |    |    | X  | X  |    |    |    |    |    |    |    |    |    |    |    |    |    |    |    |    |
| E1F2 |    |    |    |    |    |    |    |    |    |    | X  |    | X  | X  |    |    |    |    |    |    |    |    |    |    |
| A2   | X  | X  | X  | X  | X  | X  | X  | X  |    |    |    |    |    |    |    |    |    |    |    |    |    |    |    |    |
| A2A3 |    |    | X  | X  |    |    |    |    |    |    |    |    |    |    |    |    |    |    |    |    |    |    |    |    |
| A2F3 | X  |    |    |    | X  |    |    | X  |    |    |    |    |    |    |    |    |    |    |    |    |    |    |    |    |
| A2E3 |    | X  |    |    |    | X  | X  |    |    |    |    |    |    |    |    |    |    |    |    |    |    |    |    |    |
| F2   |    |    |    |    |    |    |    |    | X  | X  | X  | X  | X  | X  | X  | X  |    |    |    |    |    |    |    |    |
| F2F3 |    |    |    |    |    |    |    |    |    |    | X  | X  |    |    |    |    |    |    |    |    |    |    |    |    |
| F2E3 |    |    |    |    |    |    |    |    | X  |    |    |    | X  |    |    | X  |    |    |    |    |    |    |    |    |
| F2A3 |    |    |    |    |    |    |    |    |    | X  |    |    |    | X  | X  |    |    |    |    |    |    |    |    |    |
| E2   |    |    |    |    |    |    |    |    |    |    |    |    |    |    |    |    | X  | X  | X  | X  | X  | X  | X  | X  |
| E2E3 |    |    |    |    |    |    |    |    |    |    |    |    |    |    |    |    |    |    | X  | X  |    |    |    |    |
| E2A3 |    |    |    |    |    |    |    |    |    |    |    |    |    |    |    |    | X  |    |    |    | X  |    |    | X  |
| E2F3 |    |    |    |    |    |    |    |    |    |    |    |    |    |    |    |    |    | X  |    |    |    | X  | X  |    |
| A3   |    |    | X  | X  |    |    |    |    |    | X  |    |    |    | X  | X  |    | X  |    |    |    | X  |    |    | X  |
| F3   | X  |    |    |    | X  |    |    | X  |    |    | X  | X  |    |    |    |    |    | X  |    |    |    | X  | X  |    |
| E3   |    | X  |    |    |    | X  | X  |    | X  |    |    |    | X  |    |    |    | X  |    | X  | X  |    |    |    |    |

### Site-directed Mutagenesis (Quickchange)

Site-directed mutagenesis was performed on constructs as necessary (many clones contained mutations from the PCR ligation, and some required two rounds of mutagenesis). PCR conditions were as follows: 100 ng template, 1  $\mu$ M each primer, 1x Pfu Ultra Buffer, 200  $\mu$ M each dNTP, and 2.5 units Pfu Ultra (Stratagene).

Thermocycling conditions were as follows:

95°C for 2 minutes

16 cycles of: 95°C for 1 minute, 52°C for 1 minute, 68°C for 12 minutes

Holding at 4°C

PCR reactions were incubated with 1  $\mu$ L DpnI (NEB) overnight at 37°C. 5  $\mu$ L each reaction was transformed into Subcloning Efficiency DH5a competent cells (Invitrogen) and plated on LB/AMP plates.

### Mutagenesis Primers

EntBqc1: GCGCATGATGGAGCTGGCGGCGCGCTGGCG

EntBqc2: GCCGCCAGCTCCATCATGCGCACCGAATCC

For constructs: A2, A6

A2QC1 : GACACCGTTGAGCTGGTAATGGCTCTGGAAG 3'

A2QC2 : CCATTACCAGCTCAACGGTGTCAAGAGAATC 3'

For construct: A3

QCA3A: CCAACAATGCTTCTTTCGTTGAAGACCTGG

QCA3B: CAACGAAAGAAGCATTGTTGGTAACTTCTTC

For construct: A4

QC16A: GTCGACCTCGCCGGAGAACTCGACACGCCCTTCGTTGAAG

QC16B: GGCGTGTGCGAGTTCTCCGGCGAGGTCGACGCTGTGCTCC

For constructs: A4, E2, E9, F3

F1QC1 : CATATGAGCGCACTGACCGTCGACGACCTC 3'

F1QC2 : CGACGGTCAGTGCGCTCATATGTATATCTC 3'

For construct: E2

F1QC3: CGACCTCAAGAAACTGCTCGCCGAGACCGC

F1QC4: GAGCAGTTTCTTGAGGTCGTCGACGGTCAG

For construct: E3

F3QC3 : CGGCCACCGCCCTCGAGCACCACCACCACC

F3QC4: GGTGCTCGAGGGCGGTGGCCGGGGTGGTG

For construct: E4

QCE4A: CAATGCTTCTTTCGATGACGACAACCTGATC

QCE4B: GTCGTCATCGAAAGAAGCATTGTTGGTAAC

For constructs: E4, E7

E2QC1 : CGCATGATGGCGCTGGCGGCGCGCTGGCGC 3'

E2QC2 : CGCCGCCAGCGCCATCATGCGCACCGAATC 3'

For construct: E5

E3QC1: GCGAAAAACCCGACCATCGACGCCTGGTGGGAAG

E3QC2: GGCGTCGATGGTCGGGTTTTTCGCCAGCATGAC

For construct: E8

QCE8A: GGTGATATCGCGCTGACTGACGAGACGGTC

QCE8B: CAGTCAGCGGATATCACCATGCACTTTGC

For construct: F4

F3QC1 : CGCGAACTGCTCGACGAGGTCAACACCACC 3'

F3QC2 : CCTCGTCGAGCAGTTCGCGCGGGGTGCC

For constructs: F5, F8

F2QC1 : CTCGCGCTGCTGGAGACGGCCGCCGTGCTC 3'

F2QC2 : GGCCGTCTCCAGCAGCGCGAGGGAGTCGTAG 3'

For construct: F6

F2QC3B: CTACGACTCCCTCGCGCTGCTGGAGACGGCCGCCGTGCTCCAG

F2QC4B: GGCGGCCGTCTCCAGCAGCGCGAGGGAGTCGTAGCCGAGGTCC

**Supplementary Figure 1.** SDS-Page gel of purified AcpP-helix II mutants

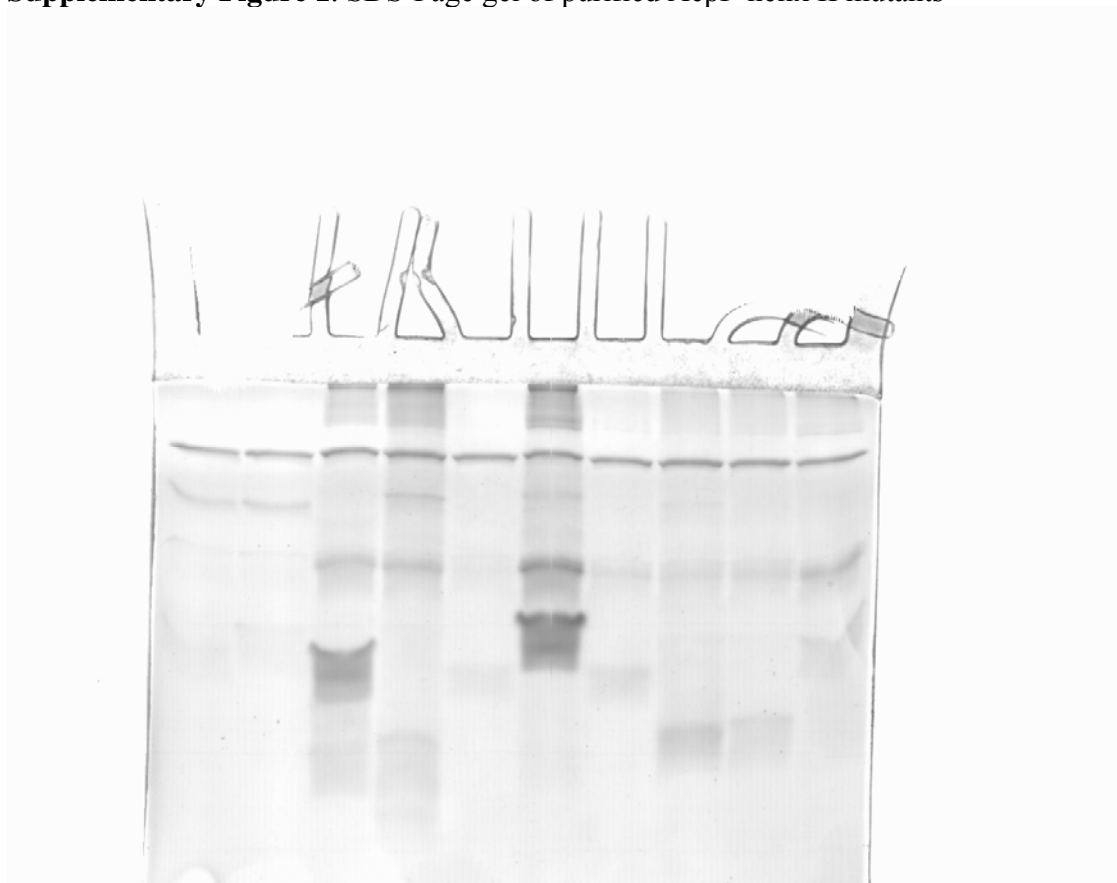

**Supplementary Figure 2.** SDS-Page gel of purified FrnN-helix II mutants

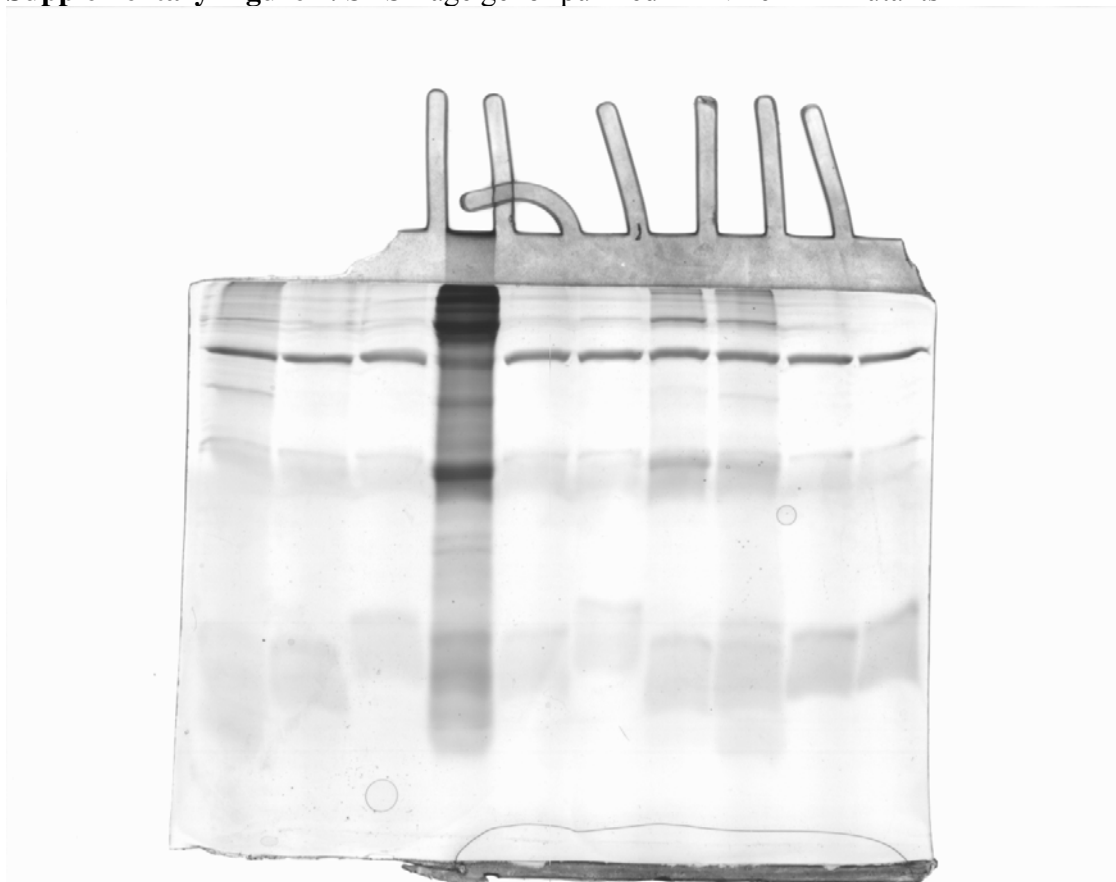

**Supplementary Figure 3.** SDS-Page gel of purified  $\Delta$ EntB-helix II mutants

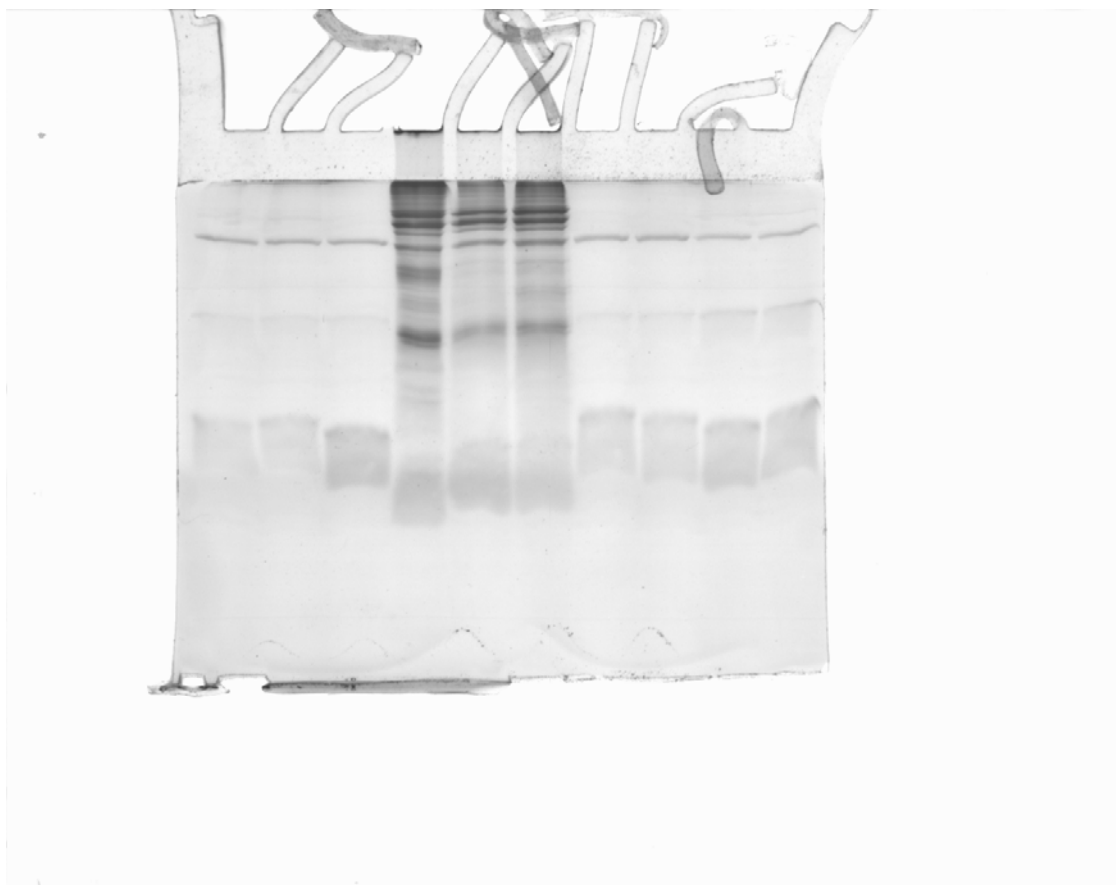

**References**

1. A. M. Gehring, K. A. Bradley, C. T. Walsh, *Biochemistry*, 1997, **36**, 8495.
